# Supplementary material
Source: PubMed Central journal article supplement (PMC8861899)
Supplement: jamaneurol-e215420-s001.pdf [file jamaneurol-e215420-s001.pdf]

## Supplemental Online Content

Laing J, Gabbe B, Chen Z, Perucca P, Kwan P, O'Brien TJ. Risk factors and prognosis of early posttraumatic seizures in moderate to severe traumatic brain injury. *JAMA Neurol*. Published online February 21, 2022. doi:10.1001/jamaneurol.2021.5420

### **eMethods**

**eTable 1.** Prevalence of EPS

**eFigure.** Incidence of Early Posttraumatic Seizures by Year from 2005-2019

**eTable 2.** Demographics and pre-existing illness

**eTable 3.** Injury and neurosurgery characteristics

**eTable 4.** Health services and vital characteristics

**eTable 5.** Hospital morbidity and mortality

**eTable 6.** Follow-up outcomes among patients survived the initial TBI admission and due for 24-month follow-up

This supplemental material has been provided by the authors to give readers additional information about their work.

**eMethods: Data Collection**

All data was supplied by the Victorian State Trauma Outcomes Registry and Monitoring Group (VSTORM), following local ethics approval (MUHREC Project ID 18104). The VSTR is a population-based trauma registry collecting data about hospitalized patients with major trauma from all 138 trauma receiving health services within the state of Victoria, Australia (population 6.5 million people) (1). Patients are included using an opt-out process, where all eligible patients are included and provided with a letter and brochure detailing their inclusion, the purpose of the registry, and how to opt-out if they wish to do so. Verbal consent for telephone interviews are obtained at follow up. The registry has ethics approval from the Department of Health and Human Services Human Research Ethics Committee (HREC), Monash University HREC, and participating trauma-receiving hospitals. Existing registry data were used and patients were not contacted as part of this study.

| <b>eTable 1. Prevalence of EPS</b> |                     |        |
|------------------------------------|---------------------|--------|
| <b>Category</b>                    | <b>N=15,152 (%)</b> |        |
| No EPS                             | 14,736              | (97.3) |
| All EPS                            | 416                 | (2.7)  |
| - Seizure                          | 389                 | (2.6)  |
| - Status epilepticus               | 27                  | (0.2)  |

**eFigure. Incidence of Early Posttraumatic Seizures by Year from 2005-2019**

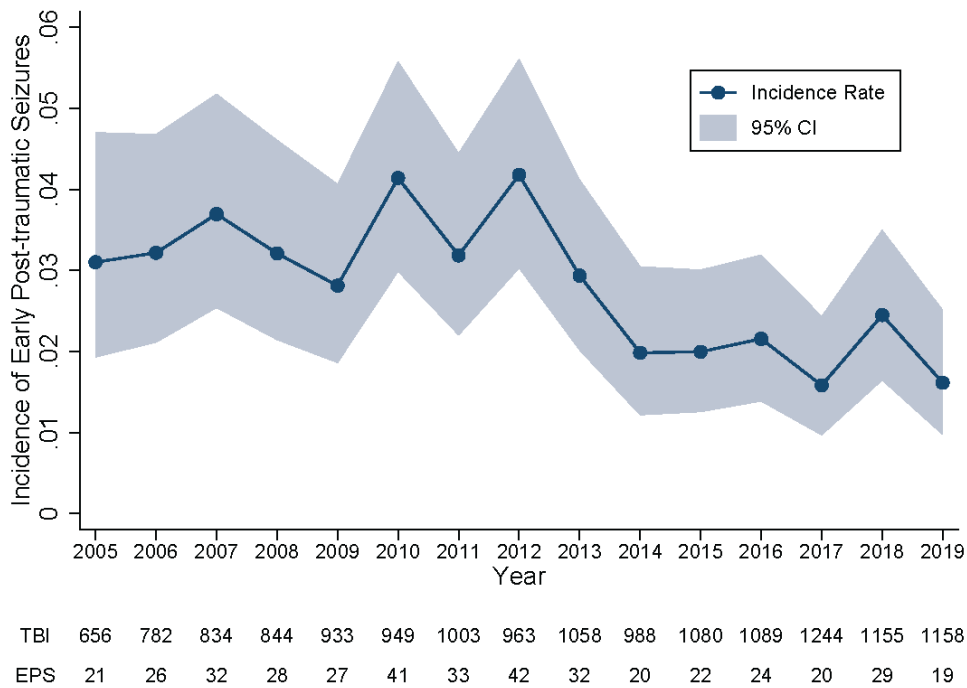

| <b>eTable 2. Demographics and pre-existing illness</b>                                                                                                                                    |          |         |       |         |                  |                                |
|-------------------------------------------------------------------------------------------------------------------------------------------------------------------------------------------|----------|---------|-------|---------|------------------|--------------------------------|
| Variable                                                                                                                                                                                  | No EPS   |         | EPS   |         | p-value          | Corrected p-value <sup>^</sup> |
|                                                                                                                                                                                           | N=14,736 |         | N=416 |         |                  |                                |
| Age - yrs                                                                                                                                                                                 |          |         |       |         | <b>&lt;0.001</b> |                                |
| Median (IQR)                                                                                                                                                                              | 60       | (35-79) | 69    | (44-81) |                  |                                |
| Sex (%)                                                                                                                                                                                   |          |         |       |         | 0.82             |                                |
| Male                                                                                                                                                                                      | 10,172   | (97.3)  | 285   | (2.7)   |                  |                                |
| Female                                                                                                                                                                                    | 4,564    | (97.2)  | 131   | (2.8)   |                  |                                |
| ARIA (%)                                                                                                                                                                                  |          |         |       |         | 0.36             |                                |
| Urban                                                                                                                                                                                     | 13574    | (97.3)  | 382   | (2.7)   |                  |                                |
| Rural                                                                                                                                                                                     | 681      | (97.8)  | 15    | (2.2)   |                  |                                |
| Missing                                                                                                                                                                                   | 481      | (96.2)  | 19    | (3.8)   |                  |                                |
| IRSAD quintile (%)                                                                                                                                                                        |          |         |       |         | 0.16             |                                |
| 1st - most disadvantaged                                                                                                                                                                  | 2,248    | (97.4)  | 60    | (2.6)   |                  |                                |
| 2nd                                                                                                                                                                                       | 2,119    | (96.8)  | 71    | (3.2)   |                  |                                |
| 3rd                                                                                                                                                                                       | 2,783    | (97.7)  | 66    | (2.3)   |                  |                                |
| 4th                                                                                                                                                                                       | 3,166    | (97.6)  | 78    | (2.4)   |                  |                                |
| 5th - least disadvantaged                                                                                                                                                                 | 3,951    | (97.0)  | 122   | (3.0)   |                  |                                |
| Missing                                                                                                                                                                                   | 469      | (96.1)  | 19    | (3.9)   |                  |                                |
| Charlson Comorbidity Index weight (%)                                                                                                                                                     |          |         |       |         | <b>&lt;0.001</b> |                                |
| 0                                                                                                                                                                                         | 7,146    | (98.6)  | 103   | (1.4)   | <b>&lt;0.001</b> | <b>&lt;0.001</b>               |
| 1                                                                                                                                                                                         | 5,415    | (97.2)  | 156   | (2.8)   | 0.753            | 0.753                          |
| 2+                                                                                                                                                                                        | 2,175    | (93.3)  | 157   | (6.7)   | <b>&lt;0.001</b> | <b>&lt;0.001</b>               |
| History of alcohol misuse (%)                                                                                                                                                             |          |         |       |         | <b>0.020</b>     |                                |
| No                                                                                                                                                                                        | 13,019   | (97.4)  | 352   | (2.6)   |                  |                                |
| Yes                                                                                                                                                                                       | 1,717    | (96.4)  | 64    | (3.6)   |                  |                                |
| History of drug misuse (%)                                                                                                                                                                |          |         |       |         | 0.54             |                                |
| No                                                                                                                                                                                        | 14,423   | (97.2)  | 409   | (2.8)   |                  |                                |
| Yes                                                                                                                                                                                       | 313      | (97.8)  | 7     | (2.2)   |                  |                                |
| History of mental health conditions (%)                                                                                                                                                   |          |         |       |         | 0.71             |                                |
| No                                                                                                                                                                                        | 11,830   | (97.2)  | 337   | (2.8)   |                  |                                |
| Yes                                                                                                                                                                                       | 2,906    | (97.4)  | 79    | (2.6)   |                  |                                |
| ARIA, accessibility and remoteness index of Australia; EPS, early posttraumatic seizure; IQR, interquartile range; IRSAD, index of relative socio-economic advantage and disadvantage.    |          |         |       |         |                  |                                |
| <sup>^</sup> p-values from pairwise comparisons were corrected for multiple comparisons using Holm-Bonferroni method. All p values for categories compared to those not in that category. |          |         |       |         |                  |                                |

| <b>eTable 3. Injury and neurosurgery characteristics</b> |          |         |       |         |                  |                                |
|----------------------------------------------------------|----------|---------|-------|---------|------------------|--------------------------------|
| Variable                                                 | No EPS   |         | EPS   |         | p-value          | Corrected p-value <sup>^</sup> |
|                                                          | N=14,736 |         | N=416 |         |                  |                                |
| Nature of injury (%)                                     |          |         |       |         | <b>&lt;0.001</b> |                                |
| Isolated TBI                                             | 6,228    | (96.4)  | 234   | (3.6)   |                  |                                |
| Multi-trauma                                             | 8,508    | (97.9)  | 182   | (2.1)   |                  |                                |
| Cause of injury (%)                                      |          |         |       |         | <b>&lt;0.001</b> |                                |
| Motor vehicle incident                                   | 2,165    | (98.6)  | 31    | (1.4)   | <b>&lt;0.001</b> | <b>&lt;0.001</b>               |
| Motorcycle                                               | 820      | (98.3)  | 14    | (1.7)   | 0.05             | 0.26                           |
| Bicycle                                                  | 568      | (98.1)  | 11    | (1.9)   | 0.20             | 0.61                           |
| Pedestrian                                               | 1,081    | (97.7)  | 25    | (2.3)   | 0.31             | 0.61                           |
| Low fall <1m                                             | 6,078    | (96.2)  | 237   | (3.8)   | <b>&lt;0.001</b> | <b>&lt;0.001</b>               |
| High fall                                                | 1,639    | (97.8)  | 37    | (2.2)   | 0.15             | 0.61                           |
| Others                                                   | 2,385    | (97.5)  | 61    | (2.5)   | 0.41             | 0.41                           |
| Nature of Head Injury (%)                                |          |         |       |         |                  |                                |
| Subdural hematoma                                        | 9,018    | (96.4)  | 340   | (3.6)   | <b>&lt;0.001</b> | <b>&lt;0.001</b>               |
| Contusion                                                | 4,495    | (97.1)  | 135   | (2.9)   | 0.40             | 0.79                           |
| Subarachnoid haemorrhage                                 | 5,553    | (96.6)  | 193   | (3.4)   | <b>&lt;0.001</b> | <b>0.002</b>                   |
| Intraventricular haemorrhage                             | 503      | (95.8)  | 22    | (4.2)   | <b>0.039</b>     | 0.20                           |
| Epidural haematoma                                       | 2,132    | (97.9)  | 45    | (2.1)   | <b>0.036</b>     | 0.22                           |
| Intracerebral haemorrhage                                | 1,913    | (97.0)  | 60    | (3.0)   | 0.39             | 1.00                           |
| Diffuse axonal injury                                    | 700      | (96.8)  | 23    | (3.2)   | 0.46             | 0.46                           |
| Base of skull fracture                                   | 4,809    | (97.9)  | 104   | (2.1)   | <b>0.001</b>     | <b>0.007</b>                   |
| Vault fractures                                          | 2,641    | (97.7)  | 62    | (2.3)   | 0.11             | 0.45                           |
| AIS head                                                 |          |         |       |         | <b>&lt;0.001</b> |                                |
| 3                                                        | 4,972    | (98.8)  | 60    | (1.2)   |                  |                                |
| 4                                                        | 5,402    | (97.6)  | 134   | (2.4)   |                  |                                |
| 5-6                                                      | 4,362    | (95.2)  | 222   | (4.8)   |                  |                                |
| Injury Severity Score (ISS)                              |          |         |       |         | <b>&lt;0.001</b> |                                |
| Median (IQR)                                             | 21.0     | (16-26) | 25.0  | (17-26) |                  |                                |
| Glasgow coma scale - head injury severity (%)            |          |         |       |         | <b>&lt;0.001</b> |                                |
| Mild (13-15)                                             | 9,948    | (97.7)  | 237   | (2.3)   | <b>&lt;0.001</b> | <b>&lt;0.001</b>               |
| Moderate (9-12)                                          | 1,202    | (96.1)  | 49    | (3.9)   | <b>0.008</b>     | <b>0.023</b>                   |
| Severe (≤8)                                              | 2,808    | (96.3)  | 107   | (3.7)   | <b>&lt;0.001</b> | <b>0.001</b>                   |
| Missing                                                  | 778      | (97.1)  | 23    | (2.9)   |                  |                                |
| Any neurosurgery (%)                                     | 2,084    | (94.5)  | 121   | (5.5)   | <b>&lt;0.001</b> |                                |

|                                                                                                                                                                                      |       |        |    |       |                  |                  |
|--------------------------------------------------------------------------------------------------------------------------------------------------------------------------------------|-------|--------|----|-------|------------------|------------------|
| Craniotomy                                                                                                                                                                           | 459   | (93.1) | 34 | (6.9) | <b>&lt;0.001</b> | <b>&lt;0.001</b> |
| Burr hole                                                                                                                                                                            | 192   | (91.4) | 18 | (8.6) | <b>&lt;0.001</b> | <b>&lt;0.001</b> |
| EVD/ICP                                                                                                                                                                              | 1,686 | (94.5) | 98 | (5.5) | <b>&lt;0.001</b> | <b>&lt;0.001</b> |
| AIS, abbreviated injury scale; EPS, early posttraumatic seizure; EVD, external ventricular drain; ICP, intracranial pressure; IQR, interquartile range; TBI, traumatic brain injury. |       |        |    |       |                  |                  |
| ^p-values from pairwise comparisons were corrected for multiple comparisons using Holm-Bonferroni method.<br>All p values for categories compared to those not in that category.     |       |        |    |       |                  |                  |

**eTable 4. Health services and vital characteristics**

| Variable                                                                                                 | No EPS   |             | EPS   |             | p-value          |
|----------------------------------------------------------------------------------------------------------|----------|-------------|-------|-------------|------------------|
|                                                                                                          | N=14,736 |             | N=416 |             |                  |
| Outcome hospital (%)                                                                                     |          |             |       |             | <b>&lt;0.001</b> |
| Major                                                                                                    | 12,082   | (82)        | 375   | (90)        |                  |
| Others                                                                                                   | 2,654    | (18)        | 41    | (10)        |                  |
| Time to primary centre - hrs                                                                             | n=14,384 |             | n=403 |             | <b>0.003</b>     |
| Median (IQR)                                                                                             | 1.62     | (1.08-3.80) | 1.77  | (1.13-14.5) |                  |
| Time to head CT - hrs                                                                                    | n=12,865 |             | n=358 |             | 0.74             |
| Median (IQR)                                                                                             | 3.58     | (2.33-8.50) | 3.58  | (2.10-17.3) |                  |
| Heart rate - beats/min                                                                                   | n=14,249 |             | n=401 |             | 0.71             |
| Median (IQR)                                                                                             | 85       | (72-100)    | 85    | (73-100)    |                  |
| Blood pressure - mmHg                                                                                    | n=14,220 |             | n=400 |             | <b>&lt;0.001</b> |
| Median (IQR)                                                                                             | 140      | (125-160)   | 147   | (130-166)   |                  |
| Hypotension - bp≤90 mmHg (%)                                                                             |          |             |       |             | 0.14             |
| No                                                                                                       | 13,743   | (93)        | 392   | (94)        |                  |
| Yes                                                                                                      | 477      | (3)         | 8     | (2)         |                  |
| Missing                                                                                                  | 516      | (4)         | 16    | (4)         |                  |
| Respiratory rate - breaths/min                                                                           | n=12,939 |             | n=359 |             | 0.75             |
| Median (IQR)                                                                                             | 18       | (16-20)     | 18    | (16-20)     |                  |
| bp, blood pressure; CT, computed tomography; EPS, early posttraumatic seizure; IQR, interquartile range. |          |             |       |             |                  |

| <b>eTable 5. Hospital morbidity and mortality</b>                                                                     |                 |        |              |        |                  |                                      |
|-----------------------------------------------------------------------------------------------------------------------|-----------------|--------|--------------|--------|------------------|--------------------------------------|
| <b>Variable</b>                                                                                                       | <b>No EPS</b>   |        | <b>EPS</b>   |        | <b>p-value</b>   | <b>Corrected p-value<sup>^</sup></b> |
|                                                                                                                       | <b>N=14,736</b> |        | <b>N=416</b> |        |                  |                                      |
| ICU admission                                                                                                         |                 |        |              |        | <b>&lt;0.001</b> |                                      |
| No                                                                                                                    | 9,324           | (63)   | 154          | (37)   |                  |                                      |
| Yes                                                                                                                   | 5,412           | (37)   | 262          | (63)   |                  |                                      |
| ICU ventilated                                                                                                        | n=5,412         |        | n=262        |        | <b>&lt;0.001</b> |                                      |
| No                                                                                                                    | 1,129           | (21)   | 32           | (12)   |                  |                                      |
| Yes                                                                                                                   | 4,283           | (79)   | 230          | (88)   |                  |                                      |
| ICU length of stay - days                                                                                             | n=5,394         |        | n=262        |        | <b>&lt;0.001</b> |                                      |
| Median (IQR)                                                                                                          | 5               | (2-11) | 8            | (4-14) |                  |                                      |
| ICU ventilated length of stay - days                                                                                  | n=4,281         |        | n=230        |        | <b>&lt;0.001</b> |                                      |
| Median (IQR)                                                                                                          | 4               | (1-9)  | 6            | (2-12) |                  |                                      |
| Hospital length of stay - days                                                                                        | n=14,394        |        | n=403        |        | <b>&lt;0.001</b> |                                      |
| Median (IQR)                                                                                                          | 7               | (4-13) | 17           | (9-29) |                  |                                      |
| In-Hospital Mortality*                                                                                                |                 |        |              |        | <b>&lt;0.001</b> | <b>&lt;0.001</b>                     |
| No                                                                                                                    | 12,416          | (84)   | 323          | (78)   |                  |                                      |
| Yes                                                                                                                   | 2,320           | (16)   | 93           | (22)   |                  |                                      |
| Discharge destination                                                                                                 |                 |        |              |        | <b>&lt;0.001</b> |                                      |
| Home                                                                                                                  | 5,514           | (37)   | 36           | (9)    | <b>&lt;0.001</b> | <b>&lt;0.001</b>                     |
| Rehabilitation                                                                                                        | 5,529           | (38)   | 232          | (56)   | <b>&lt;0.001</b> | <b>&lt;0.001</b>                     |
| Others                                                                                                                | 1,372           | (9)    | 55           | (13)   | <b>&lt;0.001</b> | <b>&lt;0.001</b>                     |
| Missing                                                                                                               | 1               | (0.01) | 0            | (0)    |                  |                                      |
| EPS, early posttraumatic seizure; ICU, intensive care unit; IQR, interquartile range.                                 |                 |        |              |        |                  |                                      |
| <sup>^</sup> p-values from pairwise comparisons were corrected for multiple comparisons using Holm-Bonferroni method. |                 |        |              |        |                  |                                      |
| *1 result missing for EPS group.                                                                                      |                 |        |              |        |                  |                                      |

**eTable 6. Follow-up outcomes among patients survived the initial TBI admission and due for 24-month follow-up**

| Variable                                       | No EPS   |       | EPS   |      | p-value <sup>^</sup> |
|------------------------------------------------|----------|-------|-------|------|----------------------|
|                                                | n=11,071 |       | n=311 |      |                      |
| Glasgow outcome scale at 24 months post-injury |          |       |       |      | <b>&lt;0.001</b>     |
| Good recovery                                  | 2,686    | (24)  | 40    | (13) |                      |
| Moderate disability                            | 2,384    | (22)  | 45    | (14) |                      |
| Severe disability                              | 1,765    | (16)  | 80    | (25) |                      |
| Vegetative state                               | 21       | (0.2) | 3     | (1)  |                      |
| Deceased                                       | 1,462    | (13)  | 68    | (22) |                      |
| Unable to determine/missing                    | 2,753    | (25)  | 75    | (24) |                      |
| PTE by 24 months post-injury                   |          |       |       |      | <b>&lt;0.001</b>     |
| No                                             | 1,306    | (12)  | 10    | (3)  |                      |
| Yes                                            | 314      | (3)   | 35    | (11) |                      |
| Incomplete#                                    | 492      | (4)   | 18    | (4)  |                      |
| Missing                                        | 8,959    | (81)  | 260   | (81) |                      |
| Use of ASM within 24 months                    |          |       |       |      | <b>&lt;0.001</b>     |
| No                                             | 2,335    | (21)  | 22    | (7)  |                      |
| Yes                                            | 543      | (5)   | 46    | (15) |                      |
| Incomplete#                                    | 1,287    | (12)  | 23    | (7)  |                      |
| Missing                                        | 6,906    | (62)  | 220   | (71) |                      |

ASM, antiseizure medication; EPS, early posttraumatic seizure; IQR, interquartile range.

<sup>^</sup>p-value from complete case analysis, i.e. excluded missing or incomplete data.

#Patients did not report development of posttraumatic epilepsy or use of ASM at 6- and/or 12-month follow-up, but missing 24-month follow-up.

## eReference

1. Cameron PA, Finch CF, Gabbe BJ, Collins LJ, Smith KL, McNeil JJ. Developing Australia's first statewide trauma registry: what are the lessons? *ANZ J Surg*. 2004 Jun 8;74(6):424–8.
